# Supplementary material for: High-resolution water level and storage variation datasets for 338 reservoirs in China during 2010–2020
Source: Copernicus journal article supplement (doi:10.5194/essd-2021-470), 2022-05-16
Supplement: Supplementary file [file essd-2021-470-CC1-supplement.pdf]

Dear authors,

thank you for submitting such an interesting paper which is likely to provide a very valuable data source for water resources studies in China. As a potential end user of this dataset, I have a suggestion for the authors to help further improve the quality of the dataset.

The figure below depicts the RWSC of GranD ID 5062, 5267 and 5410 provided by the authors in Zenodo and the in-situ RWSC collected by myself. While the authors' data generally match with the observations, several abnormal spikes (outliers) exist for these dams, for example in mid-2011 and mid-2012 for GRanD 5062, and mid-2010 and late 2013 for GRanD 5410. These spikes could lead to an overestimation of CC reported by the authors, because these spikes seem to occur less in late 2010s where the validation is performed. From my point of view, this may be a result of contaminated data points from either altimetric satellites or remote sensing images. Therefore, I would like to encourage authors to conduct a rigorous data quality control to remove any possible problematic data points before publishing the final dataset.

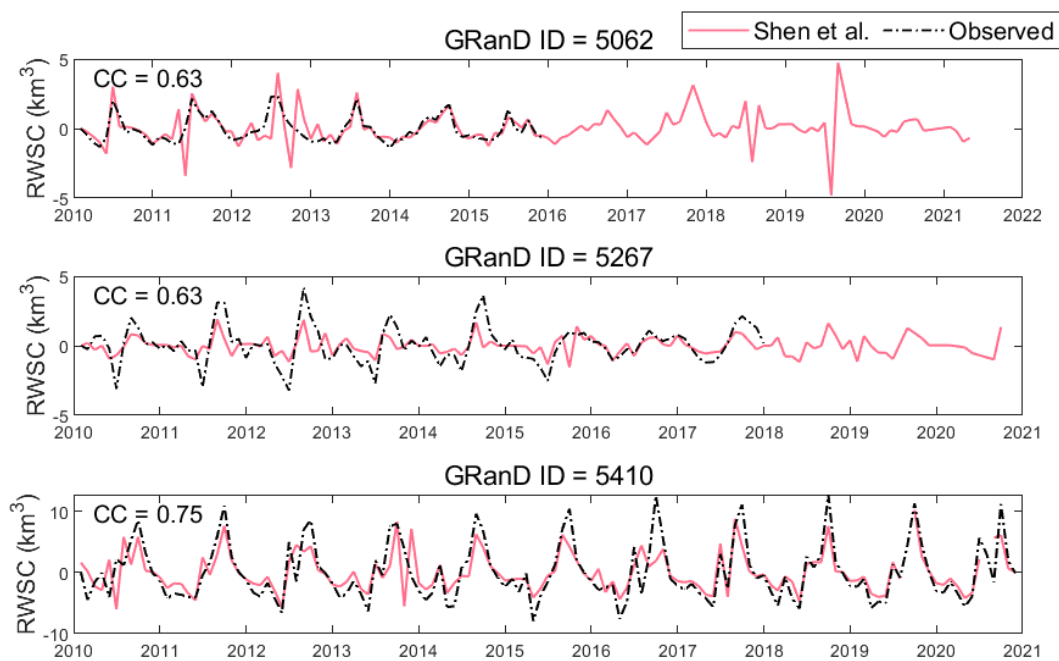

**Figure 1.** RWSC of three dams provided by authors compared with the in-situ RWSC.
